# Supplementary material for: Diflubenzuron Induces Cardiotoxicity in Zebrafish Embryos
Source: MDPI journal article supplement (doi:10.3390/ijms231911932), 2022-10-08
Supplement: s1 [file s1]

**Figure S1**

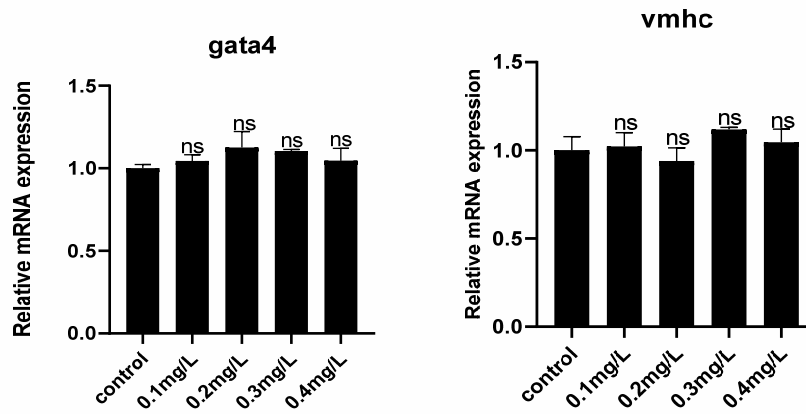

**Figure S1 Effect of diflubenzuron exposure on mRNA expression of the genes related to heart development**

The transcription of *gata4* and *vmhc* in zebrafish embryos after exposure to various concentrations of diflubenzuron (0, 0.1, 0.2, 0.3 and 0.4 mg/L) at 96 hpf. Each bar represents mean  $\pm$  SD (n=24) of three independent experiments. *ns*: no significant difference.

Figure S2

(A)

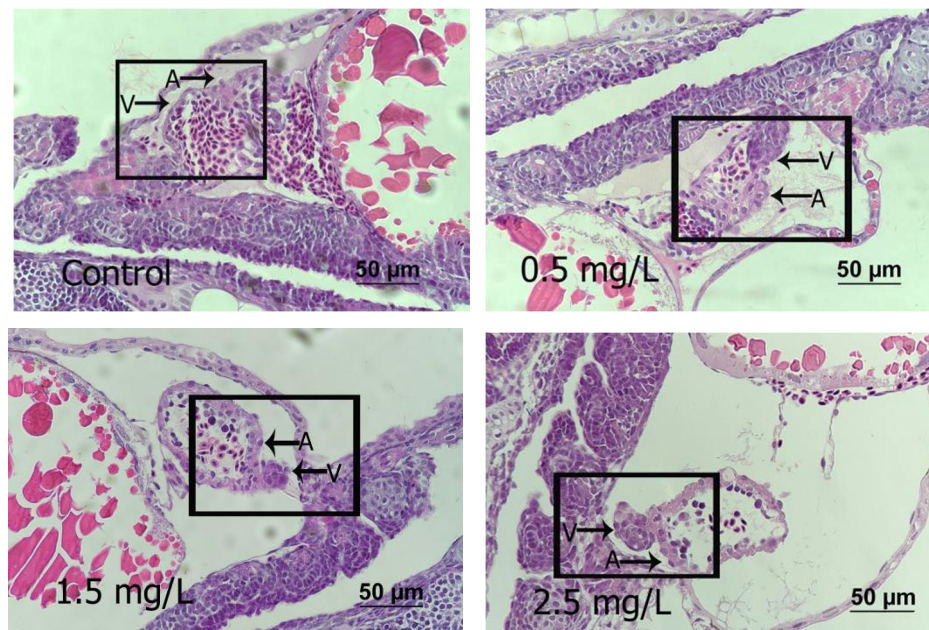

(B)

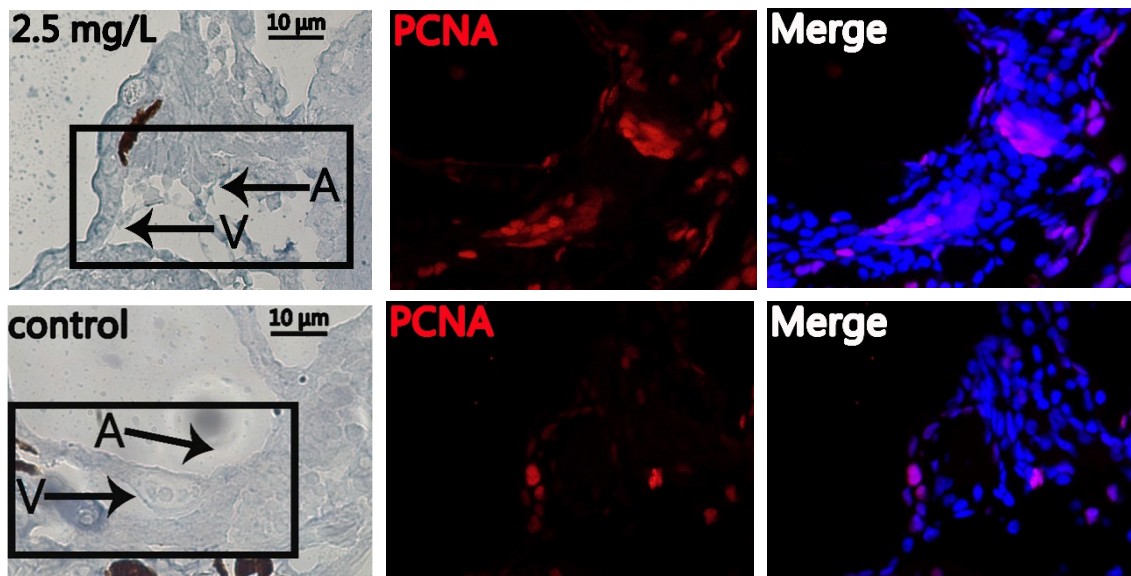

**Figure S2 Exposure to diflubenzuron induces cardiac developmental toxicity in zebrafish embryos.**

H&E staining of heart sections in control and 0.5, 1.5 and 2.5 mg/L diflubenzuron-exposed zebrafish at 96 hpf (A), The heart slices were prepared, incubated with PCNA

primary antibodies and stained with cy3-tagged second antibodies **(B)**. DAPI was used to stain the nucleus. Each of experiment was repeated at least three times.

Figure S3

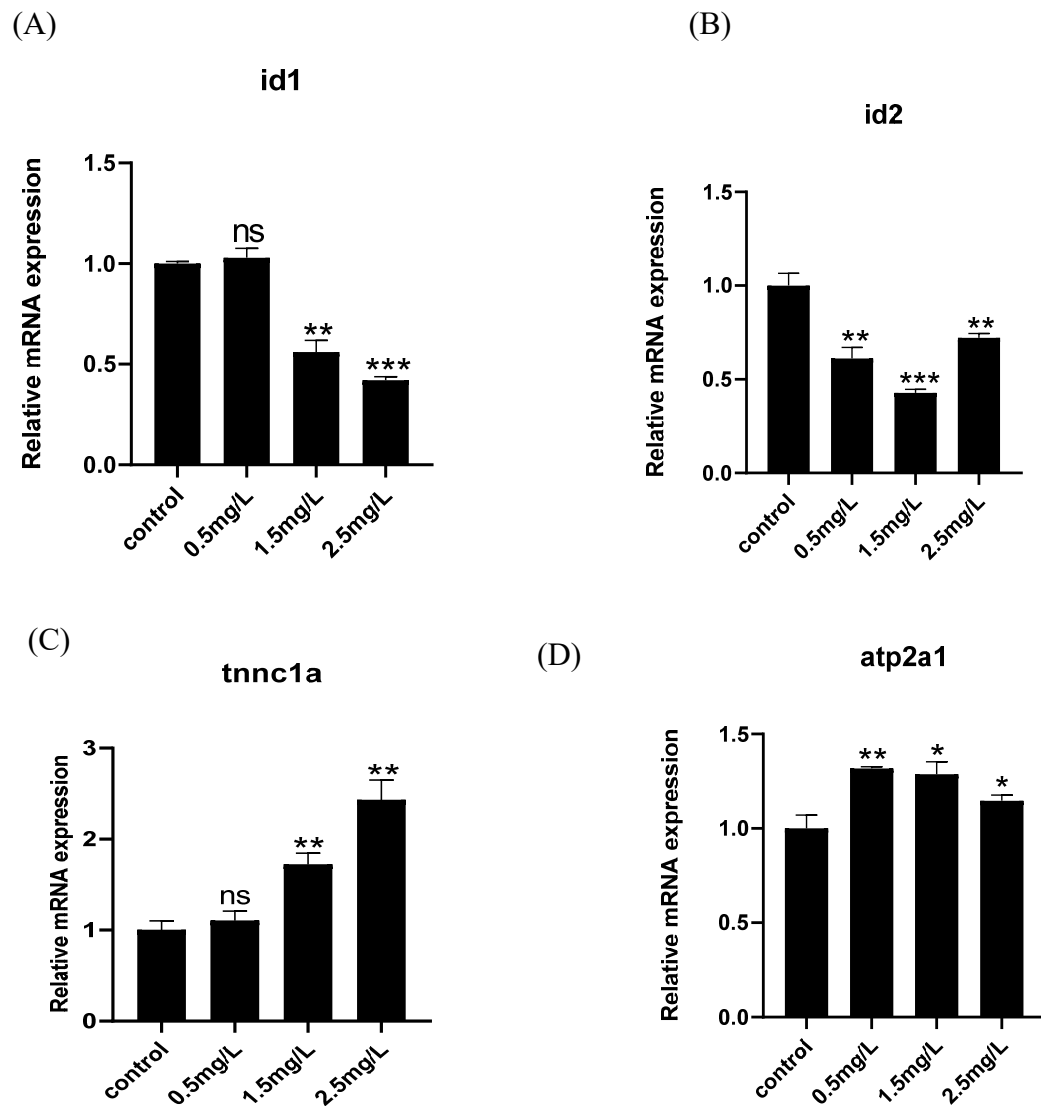

**Figure S3 Exposure of diflubenzuron affects the gene expression of embryos in BMP signaling pathway and calcium dependent signaling pathway**

Q-PCR was used to detect the genes in BMP signaling pathway (*id1* and *id2*) (**A and B**) and calcium dependent signaling pathway (*tnnc1a* and *atp2a1*) (**C and D**). Each bar represents mean  $\pm$  SD (n=24) of three independent experiments. Asterisks indicate significant differences from control, \* $p < 0.05$ , \*\* $p < 0.01$ , \*\*\* $p < 0.001$ .

Table S1

**Sequences of the qRT-PCR primers used in this study.**

| Target gene      | Prime sequence (5'-3') |
|------------------|------------------------|
| $\beta$ -actin-F | AGCACGGTATTGTGACTAACTG |
| $\beta$ -actin-R | TCGAACATGATCTGTGTCATC  |
| nppa-F           | GCTCCTGGTTTGGCAGCAG    |
| nppa-R           | GAGCTGCTGCTTCCTCTCGG   |
| gata4-F          | CTACAGGCACCCCAGCAGA    |
| gata4-R          | AGAGCCCGAGACCCGAAAT    |
| vmhc-F           | GAGCTTGATGAGGCAGAAG    |
| vmhc-R           | CAGCATAACGGAGACACAG    |
| tbx5-F           | AGTGACAGCGAACC AAAAG   |
| tbx5-R           | GTCTGGATGGACATAAAGC    |
| myh6-F           | CACCAGCAGACACTGGATG    |
| myh6-R           | GCTCCAAGTCCATTCTGAC    |
| tbx2b-F          | GGGGAACAATGGATGGCTAA   |
| tbx2b-R          | CCTAAGTGGGCTGGAAACC    |
| klf2a-F          | CCGTCTATTTCCACATTTTCG  |
| klf2a-R          | TCCAGTTCATCCTTCCACCT   |
| bax-F            | TCGAACATGATCTGTGTCATC  |
| bax-R            | TATGGCTGGGGTCACTTTTCTC |
| bcl2-F           | TGGCGTCCCAGGTAGATAAT   |
| bcl2-R           | ACCGTACATCTCCACGAAGG   |
| p53-F            | CCCGGATGGAGATAACTTG    |
| p53-R            | CACAGTTGTCCATTCAGCAC   |
| casepase3-F      | GAGACCGCTGCCCATCACTAG  |
| casepase3-R      | ATCCTTTCACGACCATCT     |
| casepase9-F      | GCCTTTCTTGATTCCCTGCG   |
| casepase9-R      | TCTTGGCCTGGTTGGTCTCA   |
| id1-F            | CAGCAAAGTTGGAGGAGAGG   |
| id1-R            | AGCCGTTCTCCACAGAGATGCT |
| id2-F            | GAGTGTAACGACGACGGAGC   |
| id2-R-F          | TGATGCAGGCTGGTTATCGC   |
| bmp4-F           | GGTCATTTTATTATGCCAAGT  |
| bmp4-R           | AAACGAATCGCAGAGGAGT    |
| atp2a1-F         | CCGACAAA ACTGGCACCTTG  |
| atp2a1-R         | CTGCAGTCAACTTTGGCACC   |
| tnnc1a-F         | GGCAGAGCAACTCACCGAT    |
| tnnc1a-R         | GTAGGGTTCTGGCCCAACAT   |
